# Supplementary material for: Oxidative post-translational modification of EXECUTER1 is required for singlet oxygen sensing in plastids
Source: PubMed Central journal article supplement (PMC6597547; doi:10.1038/s41467-019-10760-6), 2019-06-27
Supplement: 41467_2019_10760_MOESM3_ESM.pdf [file 41467_2019_10760_MOESM3_ESM.pdf]

## **Description of Additional Supplementary Files**

File Name: Supplementary Data 1

Description: List of the proteins found to be associated with EX1 in dark- and light-grown seedlings. IP-enriched samples were subjected to mass spectrometry followed by Mascot database searches. Proteins were considered co-precipitated, if found in at least three biological replicates by mass spectrometry.
